# Supplementary material for: Axial Spondylometaphyseal Dysplasia Is Caused by C21orf2 Mutations
Source: PubMed Central journal article supplement (PMC4790905; doi:10.1371/journal.pone.0150555), 2016-03-14
Supplement: pone.0150555.s001.pdf [file pone.0150555.s001.pdf]

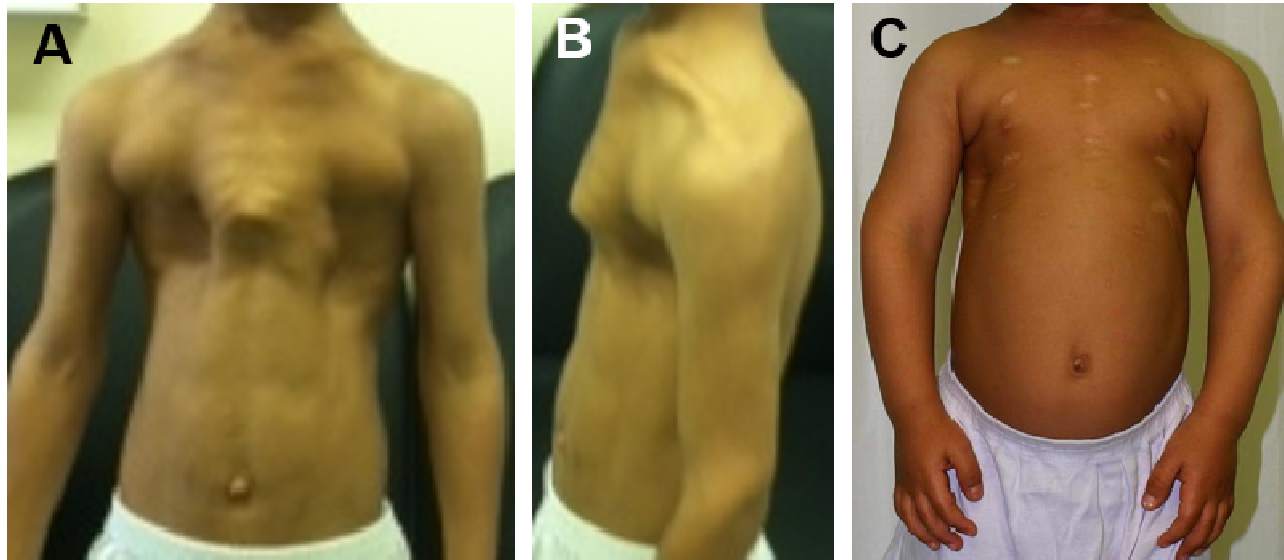

**S1 Fig. Clinical features of axial spondylometaphyseal dysplasia (axial SMD) patients with *C21orf2* mutations.** (A), (B) P7, 9-year-old boy. Very narrow chest, severe Harrison sulci with pectus carinatum. (C) P1-2, 5-year-old boy. Mild chest deformity. Both are homozygotes of the same *C21orf2* mutation, c.643-23A>T.
