# Supplementary material for: Axial Spondylometaphyseal Dysplasia Is Caused by C21orf2 Mutations
Source: PubMed Central journal article supplement (PMC4790905; doi:10.1371/journal.pone.0150555), 2016-03-14
Supplement: pone.0150555.s002.pdf [file pone.0150555.s002.pdf]

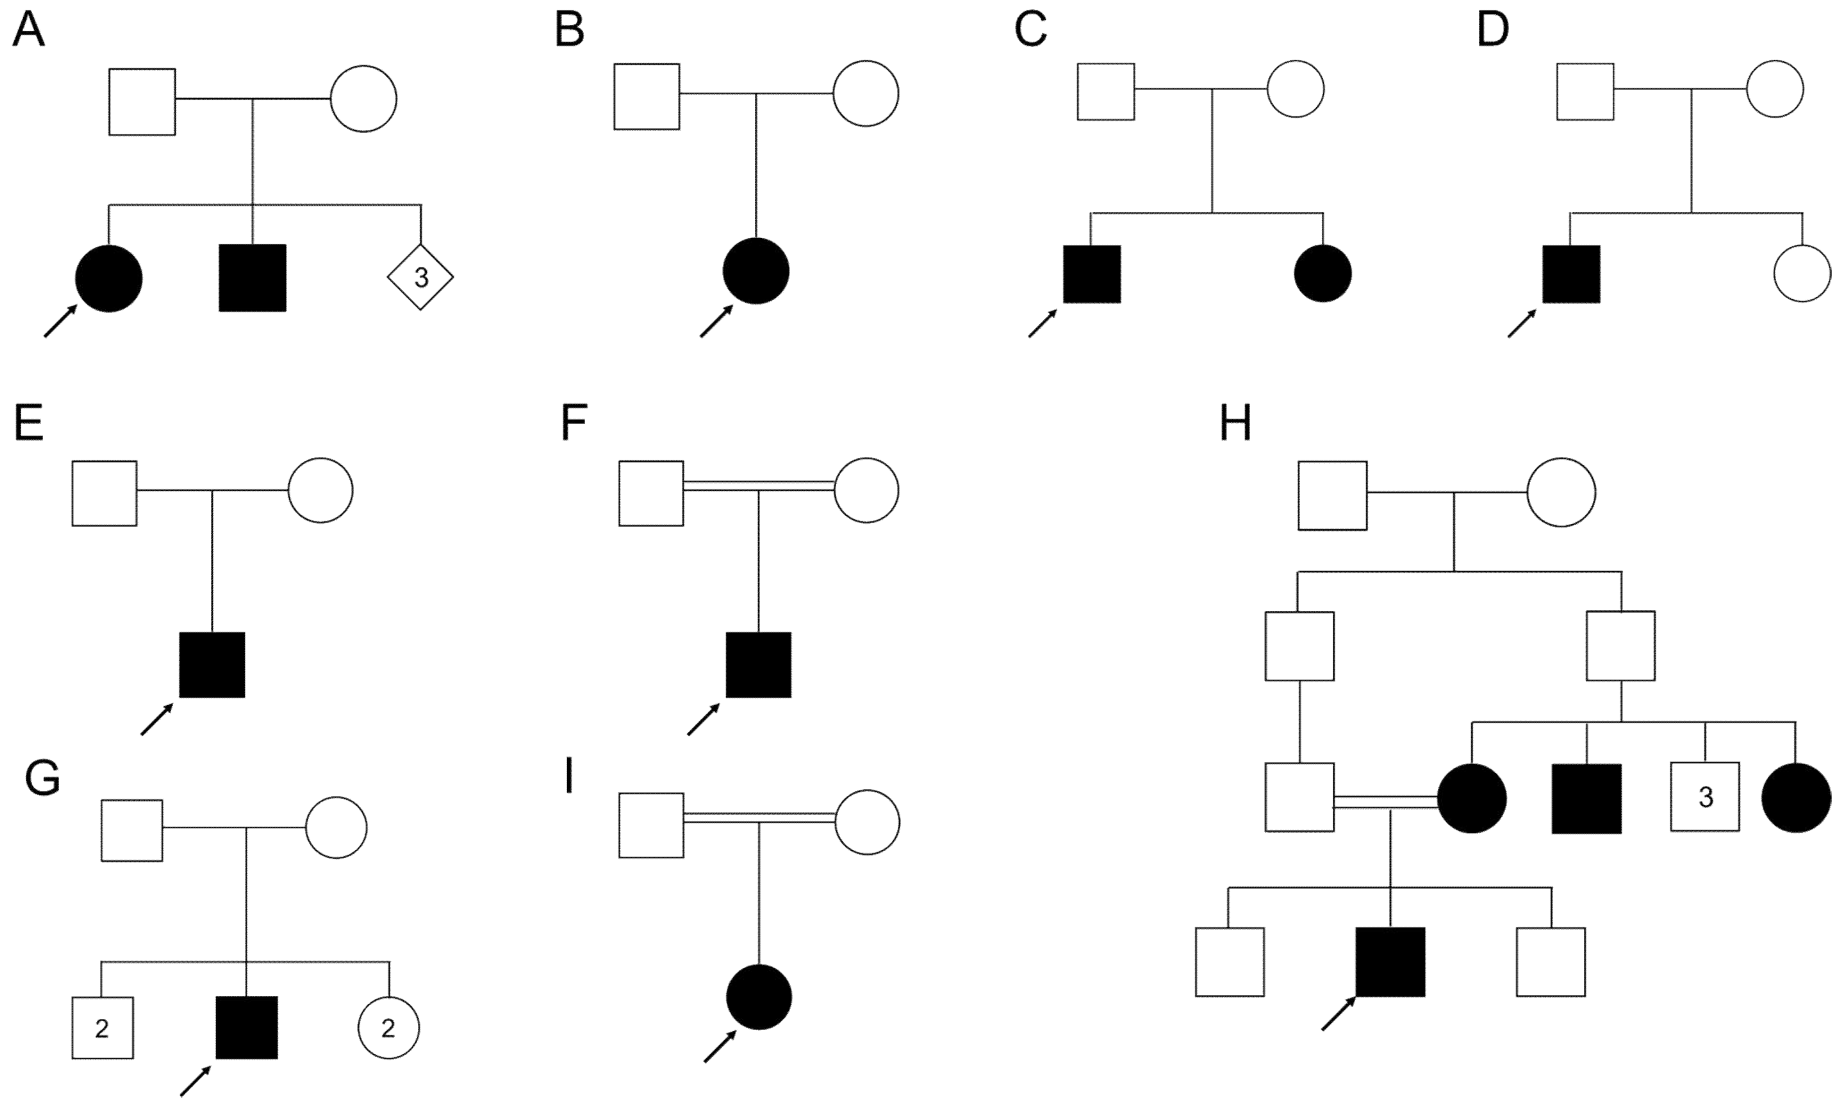

**S2 Fig. Axial SMD pedigrees in this study. (A) F1, (B) F2, (C) F3, (D) F4, (E) F5, (F) F6, (G) F7, (H) F8, (I) F9.**
