# Supplementary material for: Axial Spondylometaphyseal Dysplasia Is Caused by C21orf2 Mutations
Source: PubMed Central journal article supplement (PMC4790905; doi:10.1371/journal.pone.0150555), 2016-03-14
Supplement: pone.0150555.s003.pdf [file pone.0150555.s003.pdf]

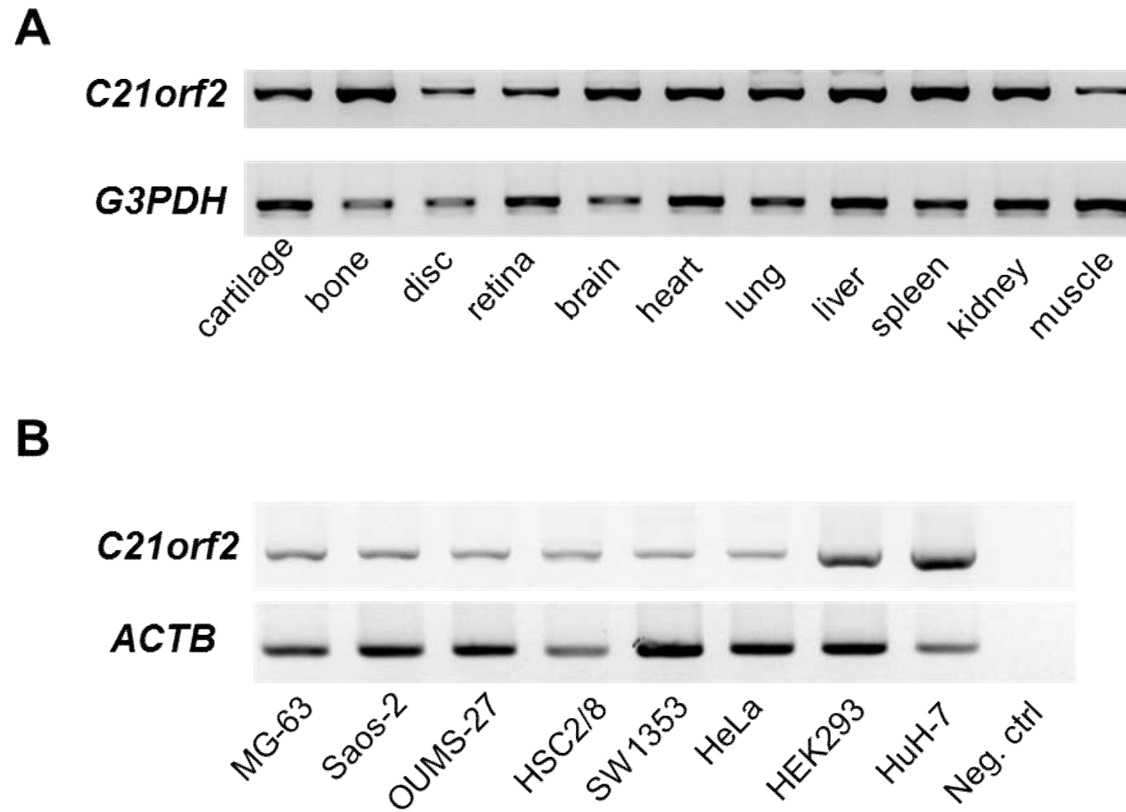

**S3 Fig. *C21orf2* expression in human.**

RT-PCR for (A) various tissues and (B) cell lines. *C21orf2* mRNA is ubiquitous expressed, including in tissues probably affected in axial SMD (cartilage, bone, vertebral disc and retina).
