# Supplementary material for: Axial Spondylometaphyseal Dysplasia Is Caused by C21orf2 Mutations
Source: PubMed Central journal article supplement (PMC4790905; doi:10.1371/journal.pone.0150555), 2016-03-14
Supplement: pone.0150555.s004.pdf [file pone.0150555.s004.pdf]

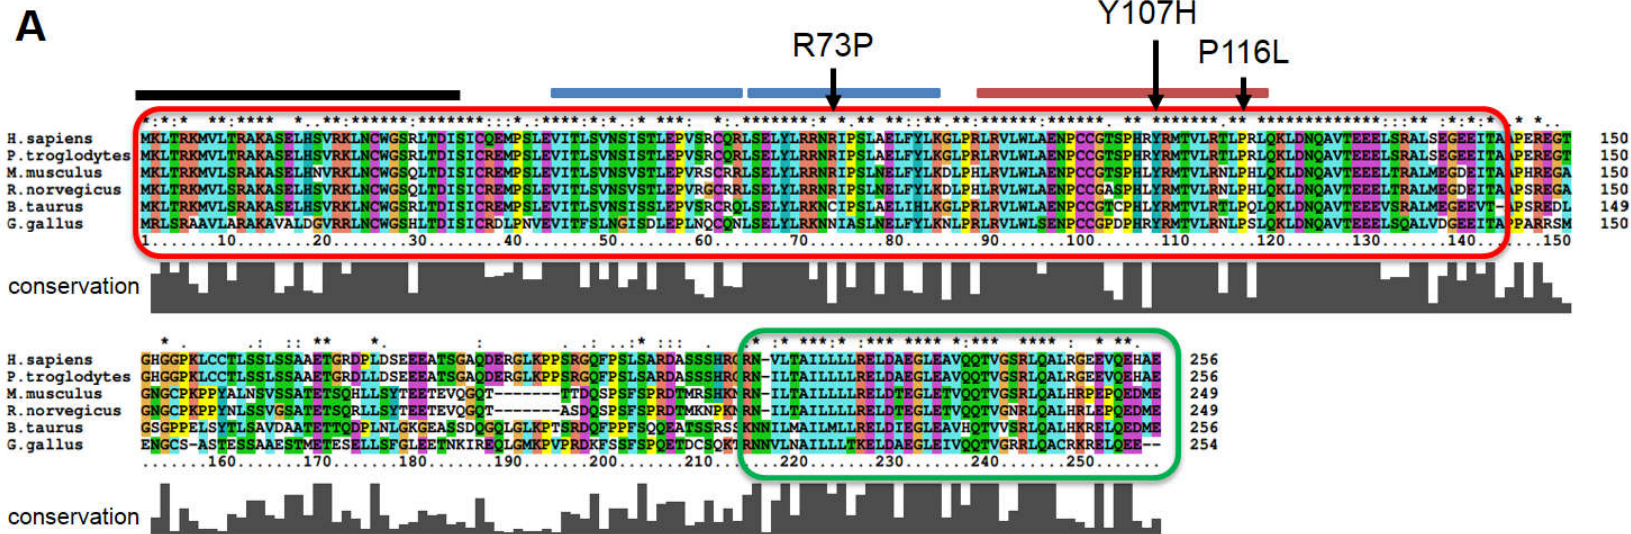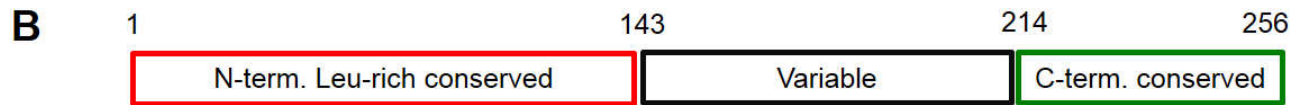

**C**

**Amino acid conservation**

| Species               | Identity (%)* | Length (aa) |
|-----------------------|---------------|-------------|
| <i>H. sapiens</i>     |               | 256         |
| <i>P. troglodytes</i> | 99            | 256         |
| <i>B. taurus</i>      | 74            | 256         |
| <i>M. musculus</i>    | 73            | 249         |
| <i>G. gallus</i>      | 61            | 254         |
| <i>X. tropicalis</i>  | 51            | 212         |
| <i>D. rerio</i>       | 55            | 365         |

\* by BLASTp

### S4 Fig. *C21orf2* is highly conserved among diverse species.

(A) ClustalX 2.1 multiple sequence alignment. There are 2 conserved regions: N-terminal region (red box) and C-terminal region (green box). Black bar: predicted mitochondria localization signal. There are two tandem LRR<sub>4</sub> domains (blue bars) followed by an LRRcap domain (brown bar). Arrow heads: position of missense mutations. (B) A schematic structure of human *C21orf2* protein. (C) Amino acid conservation among different species.
