# Supplementary material for: Axial Spondylometaphyseal Dysplasia Is Caused by C21orf2 Mutations
Source: PubMed Central journal article supplement (PMC4790905; doi:10.1371/journal.pone.0150555), 2016-03-14
Supplement: pone.0150555.s005.pdf [file pone.0150555.s005.pdf]

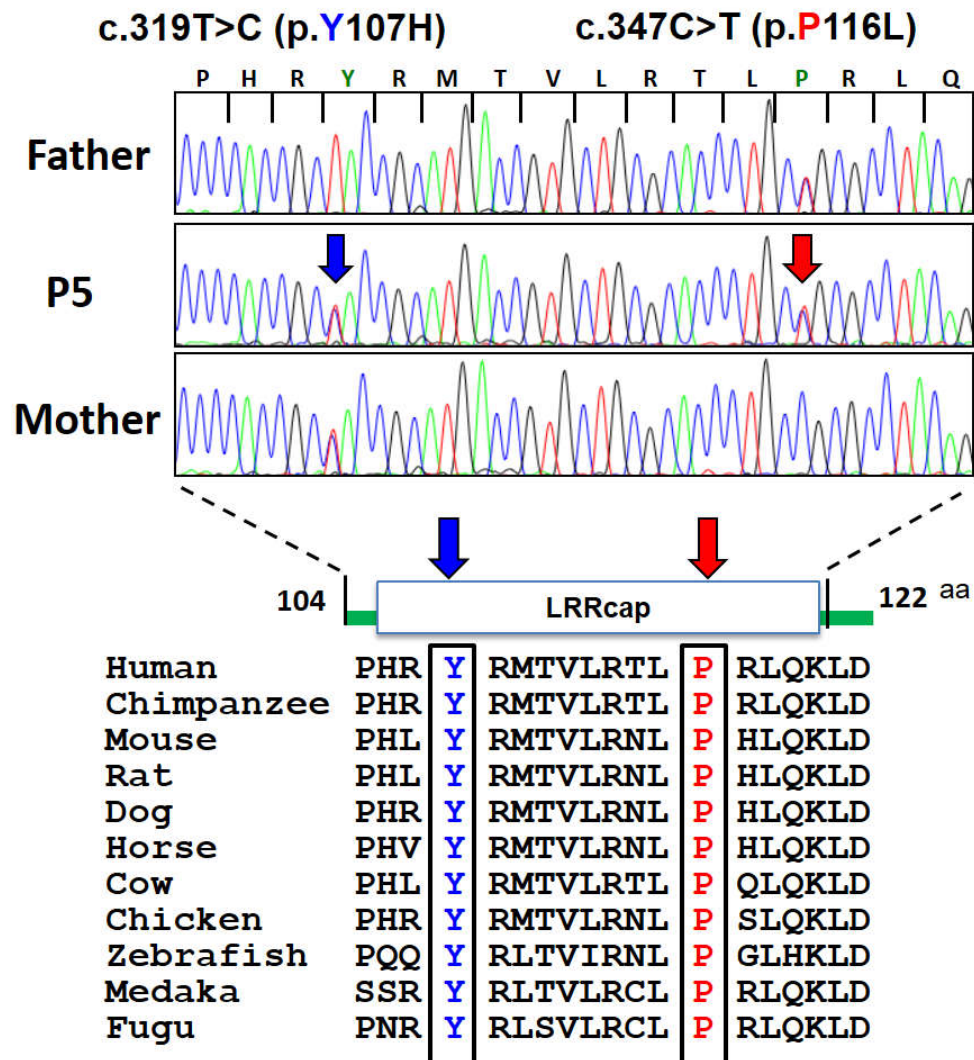

**S5 Fig. Two missense *C21orf2* mutations in Family 5.**

The Korean patient is a compound heterozygote for the mutations. The mutated amino acids are evolutionally highly conserved. LRRcap: leucine-rich repeat cap domain (A motif occurring C-terminal to LRRs in typical LRR-containing proteins).
