# Supplementary material for: Axial Spondylometaphyseal Dysplasia Is Caused by C21orf2 Mutations
Source: PubMed Central journal article supplement (PMC4790905; doi:10.1371/journal.pone.0150555), 2016-03-14
Supplement: pone.0150555.s006.pdf [file pone.0150555.s006.pdf]

**S1 Table. Summary of the exome sequencing performance**

| Family ID | Subject ID | Coverage      |               |               |               |
|-----------|------------|---------------|---------------|---------------|---------------|
|           |            | No. of bases  | Average depth | % bases > 10x | % bases > 20x |
| F1        | P2         | 3,237,878,527 | 96.73         | 96.2          | 93.2          |
| F2        | P3         | 7,322,411,597 | 218.76        | 97.2          | 96.5          |
| F3        | P4         | 2,534,981,177 | 75.73         | 91.5          | 83.9          |
| F3        | P5         | 6,835,737,251 | 204.22        | 97.2          | 96.3          |
| F4        | P6         | 6,200,400,067 | 185.24        | 97.2          | 96.3          |
| F5        | P7         | 6,242,207,776 | 186.49        | 97            | 95.7          |
| F6        | P8         | 3,653,285,254 | 109.14        | 96.3          | 93.7          |
| F7        | P9         | 3,857,929,421 | 115.26        | 96.5          | 94.1          |
| F8        | P10        | 3,445,155,985 | 102.93        | 96.4          | 93.6          |
| F8        | P11        | 3,853,068,512 | 115.11        | 96.6          | 94.5          |
| F8        | P12        | 2,978,147,369 | 88.97         | 96.2          | 92.8          |
